# Supplementary figures and images for: Vitamin C Deficiency Reduces Muscarinic Receptor Coronary Artery Vasoconstriction and Plasma Tetrahydrobiopterin Concentration in Guinea Pigs
Source: MDPI journal article supplement (doi:10.3390/nu9070691), 2017-07-03

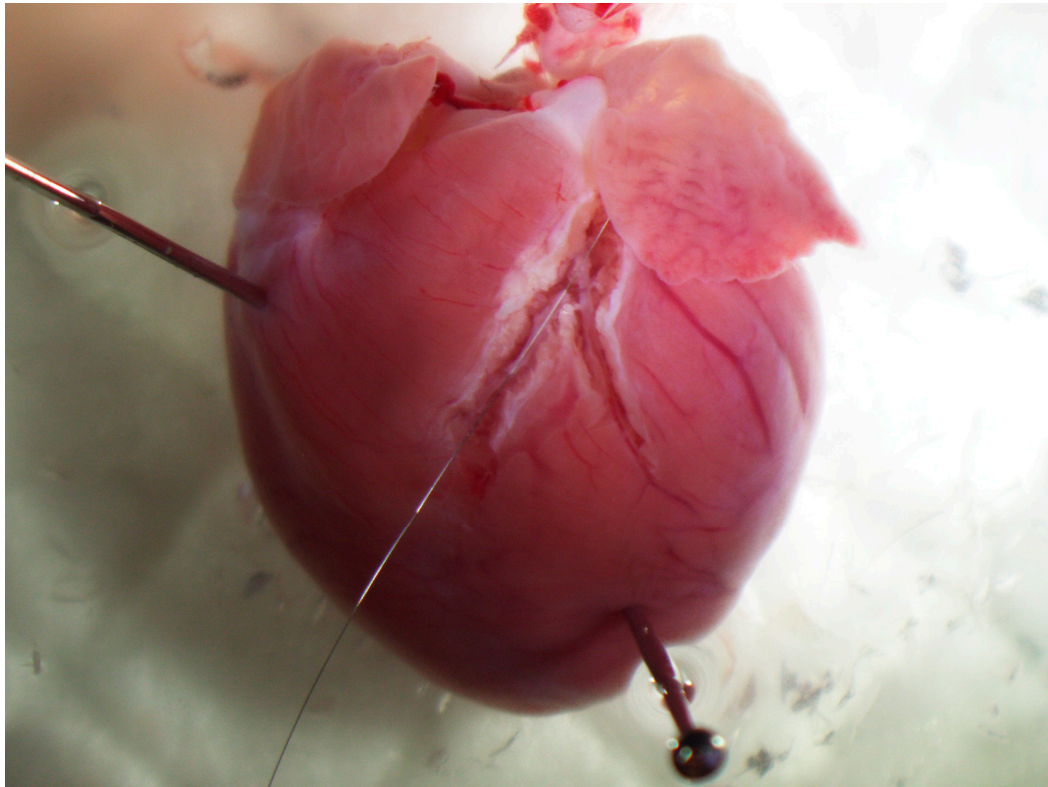

**Figure S1.** Localization of coronary artery segments used for myograph experiments.

Supplement: s1 [file s1]
